# Supplementary material for: A Novel Fluorescent Reporter System Identifies Laminin-511/521 as Potent Regulators of Cardiomyocyte Maturation
Source: PubMed Central journal article supplement (PMC7060274; doi:10.1038/s41598-020-61163-3), 2020-03-06
Supplement: 41598_2020_61163_MOESM1_ESM.pdf [file 41598_2020_61163_MOESM1_ESM.pdf]

**A Novel Fluorescent Reporter System Identifies Laminin-511/521 as Potent  
Regulators of Cardiomyocyte Maturation**

Nawin Chanthra<sup>1</sup>, Tomoyuki Abe<sup>1</sup>, Matthew Miyamoto<sup>2,3</sup>, Kiyotoshi Sekiguchi<sup>4</sup>, Chulan  
Kwon<sup>2,3</sup>, Yutaka Hanazono<sup>1,5</sup>, Hideki Uosaki<sup>1,5,\*</sup>

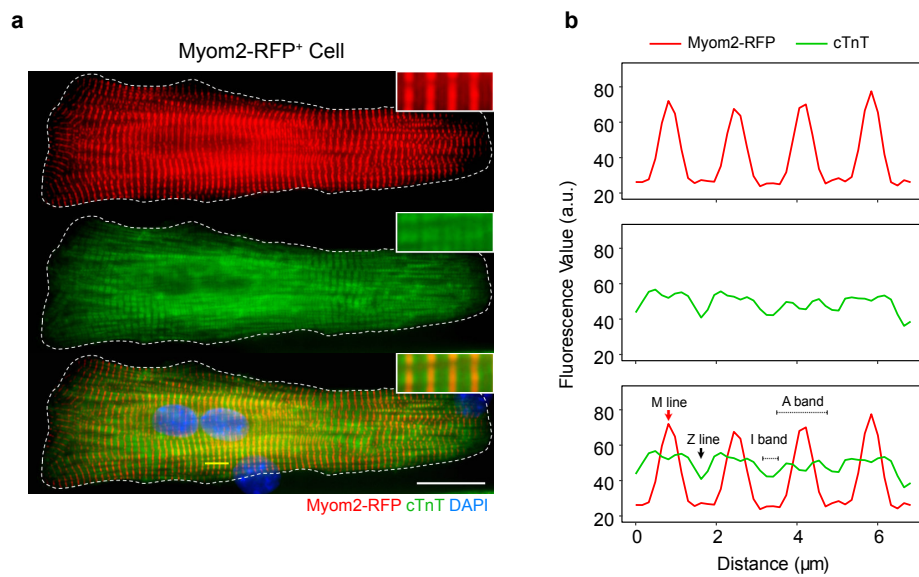

- 1 **Supplementary Figure S1.** Localizations of Myom2 and cTnT in sarcomere
- 2 structure. (a) Representative fluorescence images of RFP<sup>+</sup> cardiomyocyte. Yellow
- 3 lines indicate line-scan regions shown in (b). The regions around the lines are shown
- 4 in inset. Myom2-RFP (red); cTnT (green); Nuclei (blue). Scale bar, 20  $\mu\text{m}$ . (b)
- 5 Corresponding line scans for Myom2-RFP and cTnT localizations.

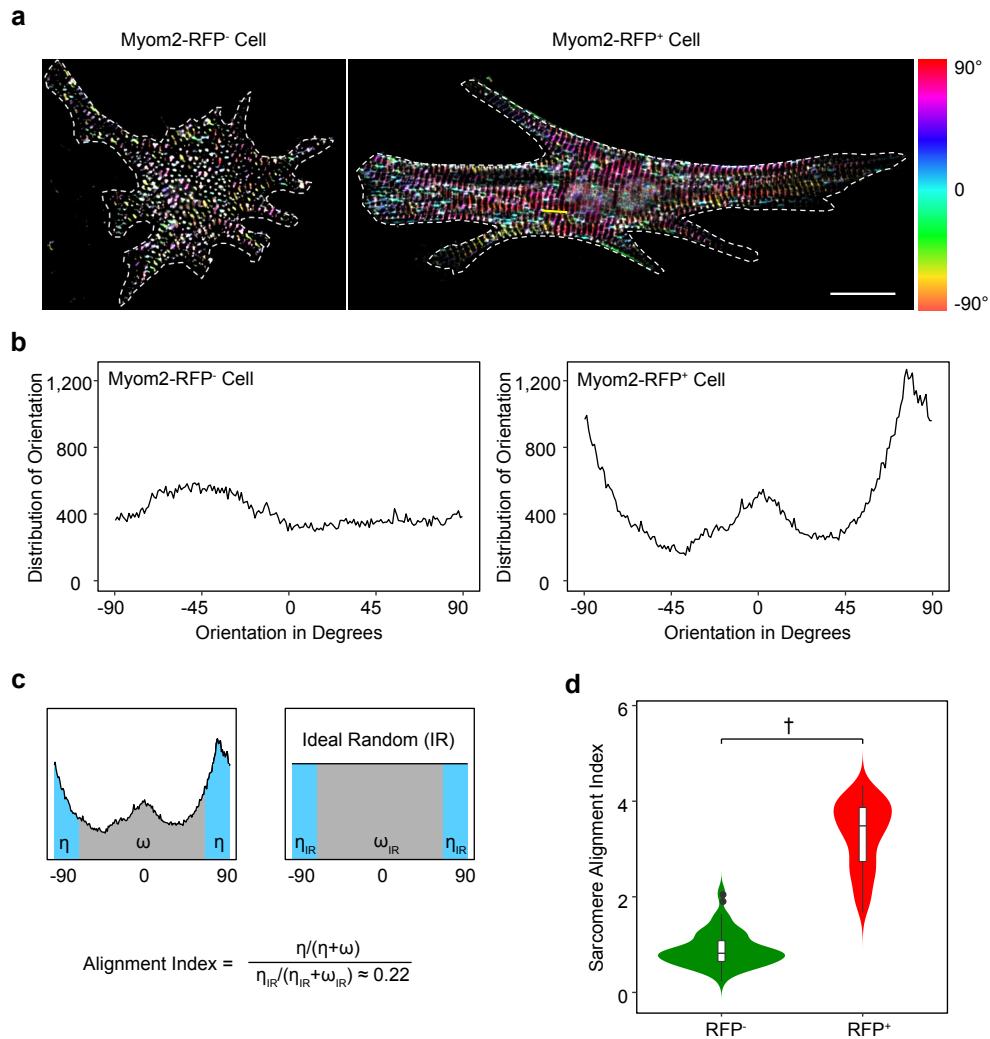

6 **Supplementary Figure S2.** Comparison of sarcomere alignment between RFP<sup>-</sup> and  
7 RFP<sup>+</sup> cardiomyocytes. **(a)** The color-coded representations of the  $\alpha$ -actinin  
8 orientation in both RFP<sup>-</sup> and RFP<sup>+</sup> cardiomyocytes. Scale bar, 20  $\mu$ m. **(b)** The  
9 corresponding distributions of orientation shown in **(a)**. **(c)** From the orientation  
10 distribution, sarcomere alignment index was calculated by sum of frequencies within  
11 20° from peak angles at -90° and 90° ( $\eta$ , blue area) against total distribution  
12 frequency ( $\eta+\omega$ ). Then, this ratio was normalized to that of an ideally random  
13 frequency distribution ( $\eta_{IR}/(\eta_{IR}+\omega_{IR})$ ),  $\sim 0.22$ . **(d)** RFP<sup>+</sup> cardiomyocytes showed  
14 higher sarcomere alignment index than RFP<sup>-</sup> cardiomyocytes ( $n > 65$ , from three  
15 different cardiac differentiation runs). Violin plots are explained in Fig. 2. Student's  $t$   
16 test; †  $P < 0.0001$ .

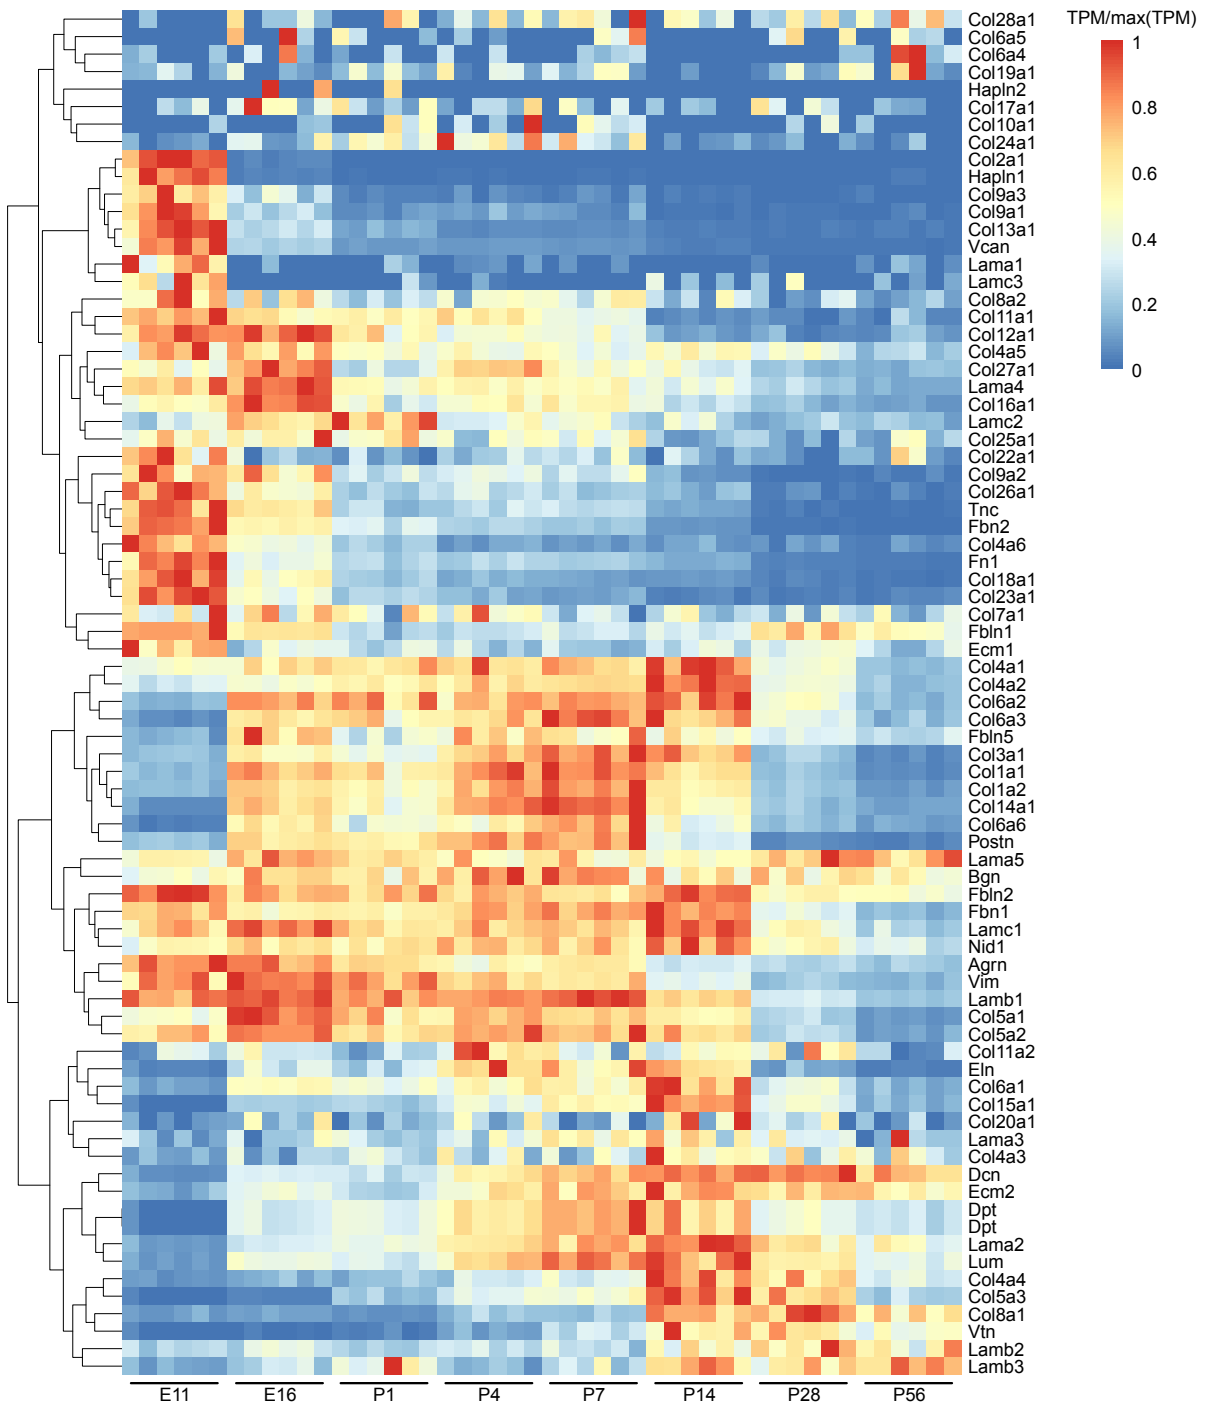

17 **Supplementary Figure S3.** A heatmap of ECM expressions during heart  
 18 development (E11 to P56). Colors are coded on the red-to-blue scale of normalized  
 19 transcripts per million reads (TPM) divided by the highest expression level  
 20 (TPM/max: high expression, red; low expression, blue).

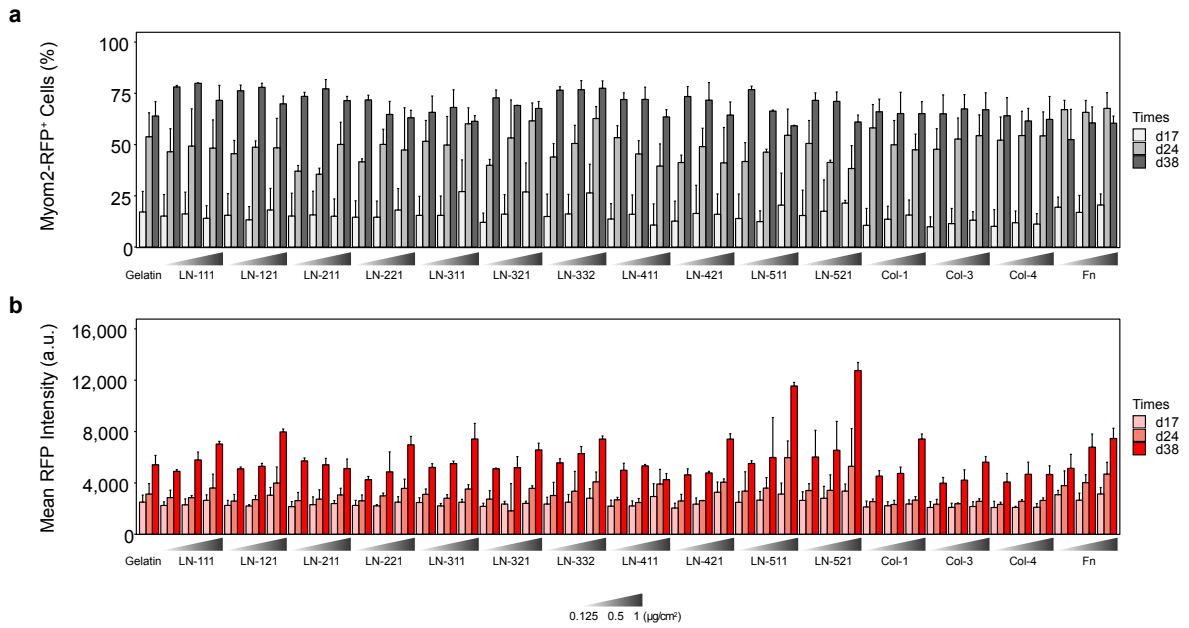

21 **Supplementary Figure S4.** ECMs increased RFP intensity as a dose-dependent  
 22 manner. **(a)** Percentages of Myom2-RFP<sup>+</sup> cardiomyocyte and **(b)** RFP intensity at day  
 23 17, 24, and 38. ECM concentration are shown at 0.125, 0.5, and 1.0 µg/cm<sup>2</sup>. Data are  
 24 presented as means ± SD (*n* = 3). Fluorescence intensities are presented as arbitrary  
 25 units (a.u.).
